# Supplementary material
Source: PubMed Central journal article supplement (PMC4125396)
Supplement: 1fd36ef23e1b08524b9fcda9aa91c04b_genetics.114.165647-5.pdf [file 1fd36ef23e1b08524b9fcda9aa91c04b_genetics.114.165647-5.pdf]

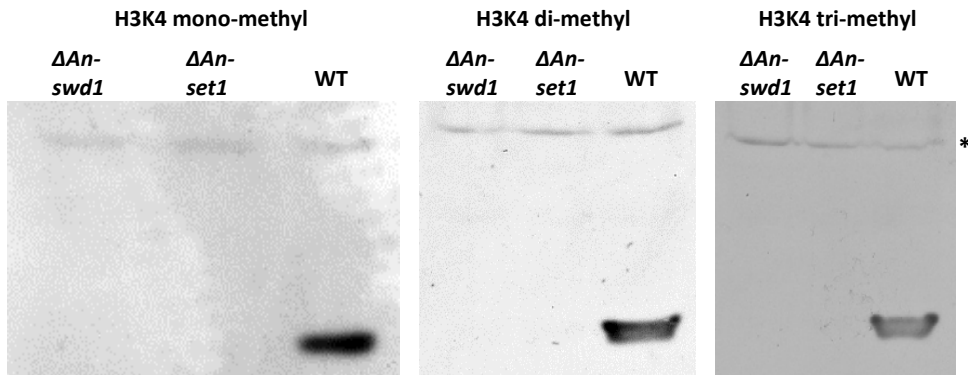

**Figure S2** Cells deleted for *An-set1* or *An-swd1* show lack of H3K4 methylation. Western blots using antibodies against monomethylated, dimethylated or trimethylated histone H3K4 show the absence of these post-translational modifications in strains lacking Set1 complex function ( $\Delta An$ -*swd1* or  $\Delta An$ -*set1*) compared to WT strains. The equal intensity of the non-specific bands (marked by asterisk) among all the lanes reveals equal loading of the lanes. Strains used: WT = R153,  $\Delta An$ -*swd1* = MG41,  $\Delta An$ -*set1* = MG177.
