# Supplementary material
Source: PubMed Central journal article supplement (PMC4125396)
Supplement: 3c77e45697a6c8d02163fe8d8d436a76_genetics.114.165647-4.pdf [file 3c77e45697a6c8d02163fe8d8d436a76_genetics.114.165647-4.pdf]

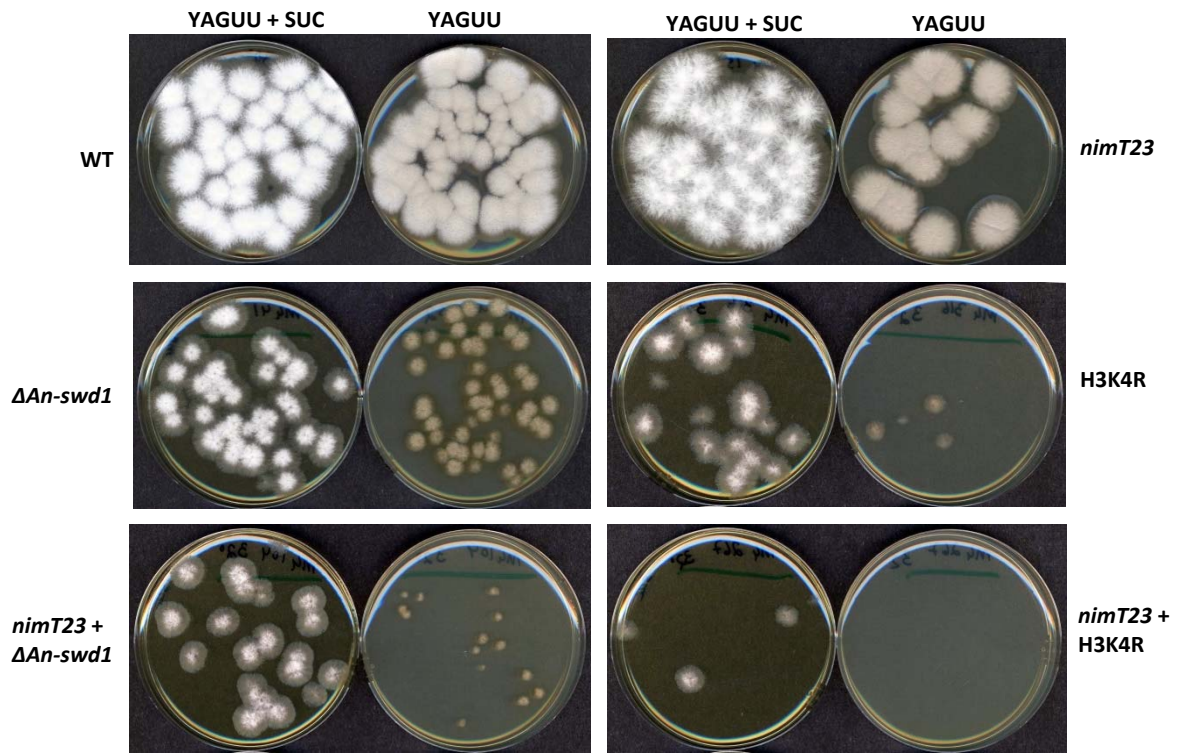

**Figure S3** The degree of genetic interaction between  $\Delta An-swd1$  and *nimT23* is not greater than that between H3K4R and *nimT23*. Colony growth of conidia spread on media with or without 1 M sucrose, as indicated, is shown after 2 days incubated at 32°C. Equal numbers of conidia were plated for each strain. Note that the viability of the H3K4R strain is reduced in the absence of sucrose and that there is a greater growth defect in the *nimT23* + H3K4R strain than for the *nimT23* +  $\Delta An-swd1$  strain. Strains used: WT = R153, *nimT23* = MG151,  $\Delta An-swd1$  = MG41, H3K4R = MG316, *nimT23* +  $\Delta An-swd1$  = MG104, *nimT23* + H3K4R = MG267.
