# Supplementary material
Source: PubMed Central journal article supplement (PMC4125396)
Supplement: 65edeb849a0a1ef4cc7b933fc46dde18_genetics.114.165647-6.pdf [file 65edeb849a0a1ef4cc7b933fc46dde18_genetics.114.165647-6.pdf]

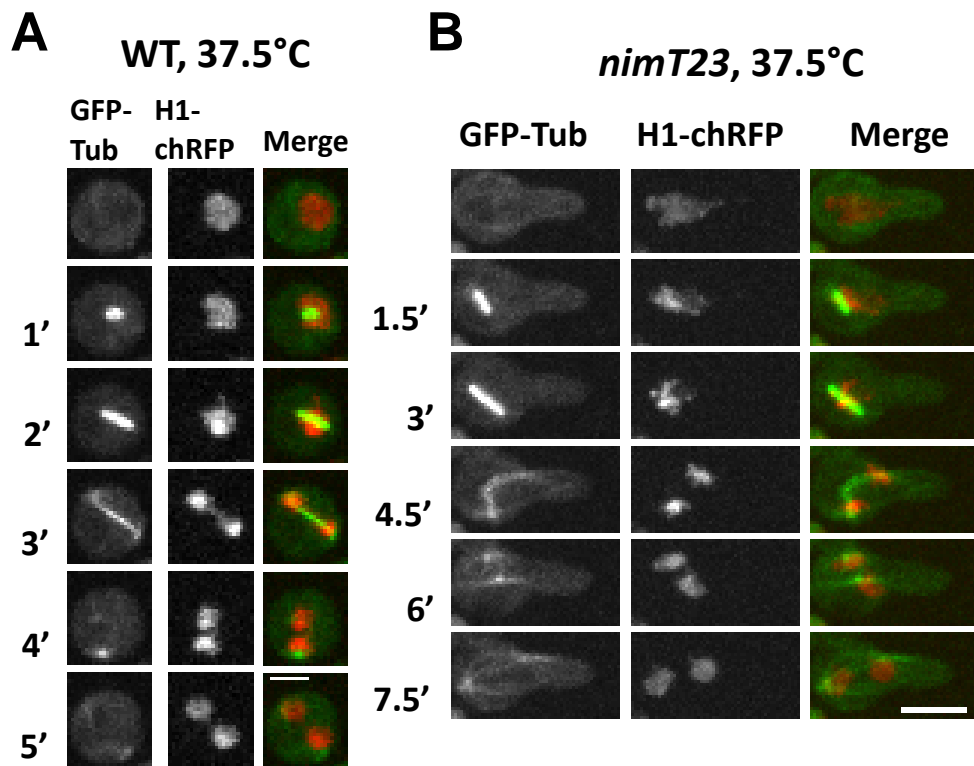

**Figure S6** Cells with partial mitotic CDK1 activity complete mitosis successfully. Mitosis in cells of WT genotype (MG300) (A) and carrying *nimT23* mutant allele (MG304) (B) was followed by live cell imaging using GFP-Tub as a marker for the mitotic spindle and histone H1-chRFP as a marker for chromatin at 37.5°C, the semi-permissive temperature for *nimT23*. In contrast to WT cells, about half (n=13) of the *nimT23* cells had established polarized growth before entering the first nuclear division (see also Figure 4C). Bar for (A) 2.5µm; Bar for (B) 5µm.
