# Supplementary material
Source: PubMed Central journal article supplement (PMC4125396)
Supplement: 81dbfd32904bbfe2a1d9c8f9ac526c2d_genetics.114.165647-3.pdf [file 81dbfd32904bbfe2a1d9c8f9ac526c2d_genetics.114.165647-3.pdf]

**Table S1 Genotypes of strains used in the study.**

| Name   | Genotype (all strains carry <i>veA1</i> )                                                                                         | Source          |
|--------|-----------------------------------------------------------------------------------------------------------------------------------|-----------------|
| R153   | <i>wA3;pyroA4</i>                                                                                                                 | Lab stock       |
| MG71   | <i>nimA7; pyrG<sup>AF</sup>insertion (pyrG89); ΔKu70::argB (argB2); riboA1; pyroA4; nicB8/A2?; wA3</i>                            | This study      |
| MG41   | <i>ΔAn-swd1::pyrG<sup>AF</sup> (pyrG89); ΔKu70::argB(argB/B2); pyroA4; nirA14; sE15, wA3; fwA1; chA1</i>                          | This study      |
| MG65   | <i>nimA7; ΔAn-swd1::pyrG<sup>AF</sup> (pyrG89); ΔKu70::argB (argB2); riboA1; pyroA4; nicB8/A2?; wA3</i>                           | This study      |
| MG99   | <i>nimT23; ΔKu70::argB (argB2); pyrG89; pyroA4; pabaA1; sE15; wA3</i>                                                             | This study      |
| MG104  | <i>nimT23; ΔAn-swd1::pyrG<sup>AF</sup>(pyrG89); ΔKu70::argB (argB2); pyroA4; pabaA1; sE15; wA3</i>                                | This study      |
| MG177  | <i>ΔAn-set1::pyrG<sup>AF</sup> (pyrG89); ΔKu70::argB(argB/B2); pyroA4; nirA14; sE15, wA3; fwA1; chA1</i>                          | This study      |
| MG179  | <i>ΔAn-set1::pyrG<sup>AF</sup> (pyrG89); nimA7; ΔKu70::argB (argB2); riboA1; pyroA4; nicB8/A2?; wA3</i>                           | This study      |
| MG181  | <i>ΔAn-set1::pyrG<sup>AF</sup>(pyrG89); nimT23; ΔKu70::argB (argB2); pyroA4; pabaA1; sE15; wA3</i>                                | This study      |
| MG316  | <i>H3K4R::pyrG<sup>AF</sup> (pyroG89); ΔKu70::argB(argB/B2); pyroA4; nirA14; sE15, wA3; fwA1; chA1</i>                            | This study      |
| MG318  | <i>H3K4R::pyrG<sup>AF</sup> (pyrG89); nimA7; ΔKu70::argB (argB2); riboA1; pyroA4; nicB8/A2?; wA3</i>                              | This study      |
| MG267  | <i>H3K4R::pyrG<sup>AF</sup>(pyrG89); nimT23; ΔKu70::argB (argB2); pyroA4; pabaA1; sE15; wA3</i>                                   | This study      |
| MG327  | <i>H3S10A::pyrG<sup>AF</sup> (pyrG89); ΔKu70::argB(argB/B2); pyroA4; nirA14; sE15, wA3; fwA1; chA1</i>                            | This study      |
| MG320  | <i>H3K4R+S10A::pyrG<sup>AF</sup> (pyroG89); ΔKu70::argB(argB/B2); pyroA4; nirA14; sE15, wA3; fwA1; chA1</i>                       | This study      |
| HA365  | <i>GFP-tub; An-H1-chRFP::pyroA<sup>AF</sup>; pyrG89; (pyroA4; argB2?); ΔKuA::argB</i>                                             | Lab stock [1,2] |
| HA375  | <i>nimT23; GFP-tub; An-H1-chRFP::pyroA<sup>AF</sup>; pyrG89; (pyroA4; argB2?); ΔKuA::argB</i>                                     | Lab stock [1,2] |
| MG160  | <i>ΔAn-swd1::pyrG<sup>AF</sup> (pyrG89); ΔKu70::argB (argB2/argB?); H1chRFP::pyroA<sup>AF</sup>(pyroA4); GFP-tub; wA3</i>         | This study      |
| MG161  | <i>nimT23; ΔAn-swd1::pyrGAF (pyrG89); ΔKu70::argB (argB2/argB?);tubAGFP; H1chRFP::pyroA<sup>AF</sup> (pyroA4)</i>                 | This study      |
| MG300  | <i>pyrG89; H1-chRFP::pyro<sup>AF</sup> (pyroA4); GFP-tub; argB2; nirA14?; nicB8/A2?</i>                                           | This study      |
| MG304  | <i>nimT23; pyrG89; GFP-tub; H1-chRFP::pyro<sup>AF</sup> (pyroA4); argB2; sE15?; yA2/3</i>                                         | This study      |
| MG276  | <i>ΔAn-swd1::pyrG<sup>AF</sup> (pyrG89);H1-chRFP::pyro<sup>AF</sup> (pyroA4); GFP-tub; argB2; nirA14?; nicB8/A2?; wA3</i>         | This study      |
| MG302  | <i>nimT23; ΔAn-swd1::pyrG<sup>AF</sup> (pyrG89); GFP-tub; H1-chRFP::pyro<sup>AF</sup> (pyroA4); argB2; sE15?; fw/wA3</i>          | This study      |
| MG153  | <i>nimA7; pyrG89; ΔKu70::argB? (argB2/argB?); H1chRFP::pyroAAF(pyroA4); GFP-tub; nicB8/A2?</i>                                    | This study      |
| MG159  | <i>ΔAn-swd1::pyrG<sup>AF</sup> (pyrG89); nimA7; ΔKu70::argB (argB2/argB?); H1chRFP::pyroAAF (pyroA4); GFP-tub; nicB8/A2?; wA3</i> | This study      |
| MG224  | <i>argB2; sE15; GFP-tub; AN162-CR; pyrG89; pyroA4; wA2/3; nicB8/A2?; nirA14?</i>                                                  | This study      |
| MG227  | <i>argB2; sE15; nimA7; pyrG89; pyroA4; GFP-tub; AN162-CR; nicB8/A2?; nirA14?; wA2/3</i>                                           | This study      |
| MG190  | <i>nimA7; pyrG89; argB2; ndc80-CR::pyroA<sup>AF</sup> (pyroA4?); GFP-tub; chaA1; GCP3-GFP::riboB<sup>AF</sup>; nicB8/A2?</i>      | This study      |
| MG229  | <i>nimA7; argB2; pyrG89; ΔyA::NLS-DsRed; GFP-tub; pyroA4; nicB8/A2?</i>                                                           | This study      |
| MG244  | <i>argB2; ΔAn-swd1::pyrG<sup>AF</sup> (pyrG89); ΔyA::NLSDsRed; GFP-tub; nicB8/A2?; pyroA4; wA3</i>                                | This study      |
| MG243  | <i>Δswd1-pyrG<sup>AF</sup>(pyrG89); nimA7; GFP-tub; ΔyA::NLS-DsRed; argB2; wA3; pyroA4; nicB8/A2?</i>                             | This study      |
| MG213  | <i>nimA7; Δswd1-pyrG<sup>AF</sup>(pyrG89); argB2; nup49-CR::pyroA<sup>AF</sup>(pyroA4); GFP-tub; nirA14?; nicB8/A2?; wA3</i>      | This study      |
| CDS790 | <i>nimA7; argB2; wA3</i>                                                                                                          | [3]             |
| MG215  | <i>nimA7; Δswd1-pyrG<sup>AF</sup>(pyrG89); argB2; nicB8/A2?; wA3</i>                                                              | This study      |
| CDS629 | <i>ΔAn-mad2::pyrG<sup>AF</sup>; pyroA4; pyrG89; chaA1</i>                                                                         | [4]             |
| MG383  | <i>ΔAn-swd1::pyrG<sup>AF</sup>(pyrG89); ΔAn-mad2::pyrG<sup>AF</sup>(pyrG89); pyroA4; nirA14?; nicB8/A2?; chaA1</i>                | This study      |
| MG381  | <i>nimA7; ΔAn-mad2::pyrG<sup>AF</sup>(pyrG89); pyroA4; nirA14?; nicB8/A2?; chaA1</i>                                              | This study      |
| MG405  | <i>nimT23; ΔAn-mad2::pyrG<sup>AF</sup>(pyrG89); pyroA4; argB2; sE15?; wA/chaA/fw</i>                                              | This study      |
| MG384  | <i>nimA7; ΔAn-swd1::pyroG<sup>AF</sup> (pyrG89); Δmad2::pyrG<sup>AF</sup> (pyrG89);pyroA4; nirA14?; nicB8/A2?; wA/chaA1</i>       | This study      |
| MG219  | <i>nimT23; Δswd1-pyrG<sup>AF</sup>(pyrG89); argB2; pabaA1; pyroA4; sE15?; wA/yA</i>                                               | This study      |
| SOS3   | <i>nimT23; wA2</i>                                                                                                                | [5]             |
| MG402  | <i>nimT23; ΔAn-swd1::pyrG<sup>AF</sup> (pyrG89); Δmad2::pyrG<sup>AF</sup> (pyrG89); pyroA4; argB2; sE15?; wA/chaA/fw</i>          | This study      |
| MG218  | <i>Δswd1-pyrG<sup>AF</sup>(pyrG89); riboA1; argB2; nicB8/A2?; wA3</i>                                                             | This study      |
| MG151  | <i>pyrG<sup>AF</sup> insertion (pyrG89); nimT23; ΔKu70::argB (argB2); pyroA4; pabaA1; sE15; wA3.</i>                              | This study      |
| MG411  | <i>ΔAn-swd1::pyroA<sup>AF</sup> (pyroA4); H3K4R::pyrG<sup>AF</sup> (pyrG89); sE15; nirA14; wA3; fwA1; chA1.</i>                   | This study      |

Question marks indicate mutations or alleles that may be present in the strain and have not been tested for.
