# Supplementary material
Source: PubMed Central journal article supplement (PMC4125396)
Supplement: 78166d5462fe89336703a52127b929f3_genetics.114.165647-1.pdf [file 78166d5462fe89336703a52127b929f3_genetics.114.165647-1.pdf]

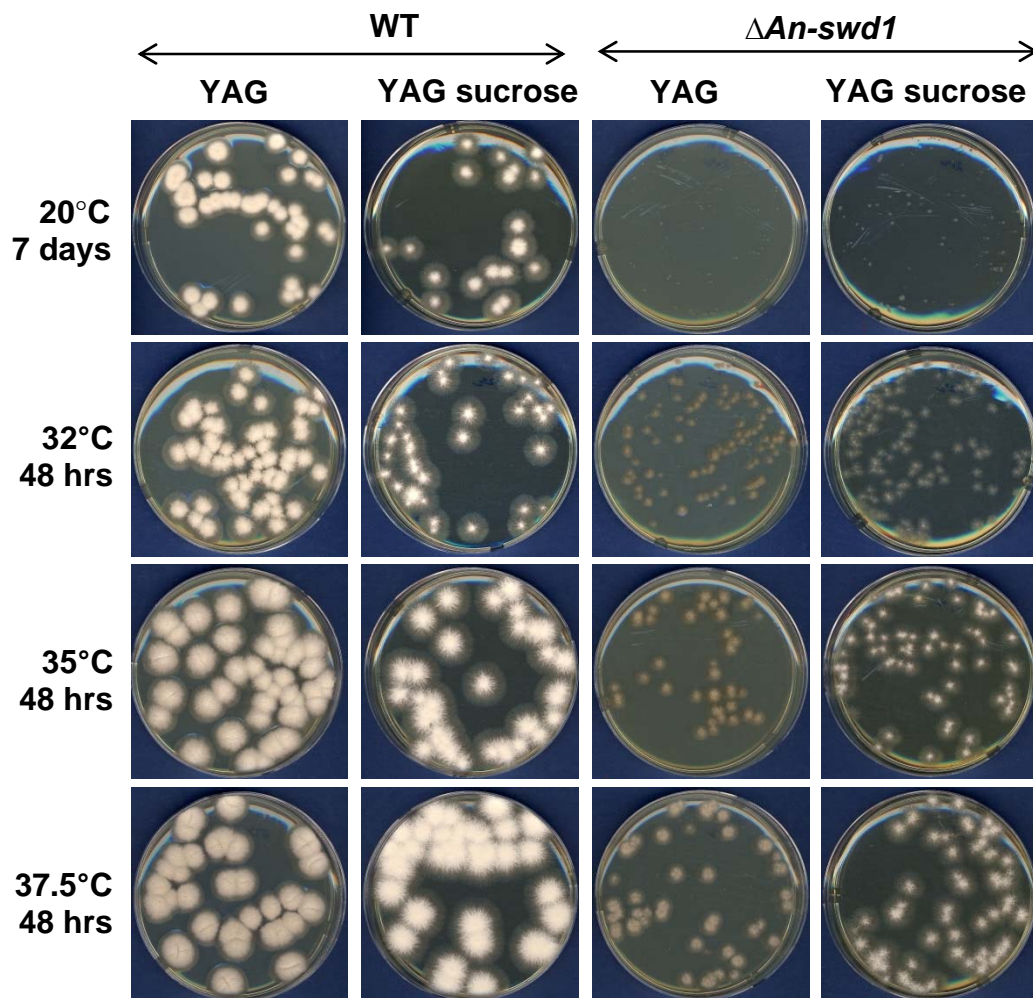

**Figure S1** Deletion of *An-swd1* confers cold sensitivity. Colony growth of  $\Delta An-swd1$  (strain MG41) from single conidia at the indicated temperatures on media with or without 1 M sucrose, in comparison to wild type (WT, strain R153). The conidiation defects, but not cold sensitivity, of  $\Delta An-swd1$  cells are remediated in the presence of 1 M sucrose.

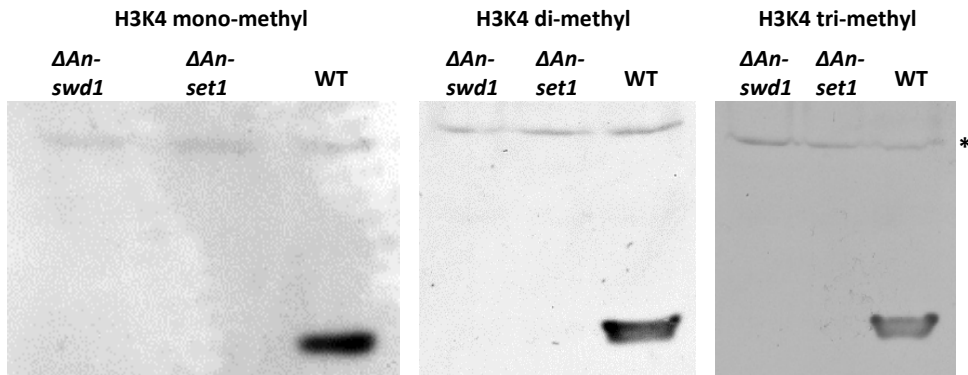

**Figure S2** Cells deleted for *An-set1* or *An-sw1* show lack of H3K4 methylation. Western blots using antibodies against monomethylated, dimethylated or trimethylated histone H3K4 show the absence of these post-translational modifications in strains lacking Set1 complex function ( $\Delta An$ -*sw1* or  $\Delta An$ -*set1*) compared to WT strains. The equal intensity of the non-specific bands (marked by asterisk) among all the lanes reveals equal loading of the lanes. Strains used: WT = R153,  $\Delta An$ -*sw1* = MG41,  $\Delta An$ -*set1* = MG177.

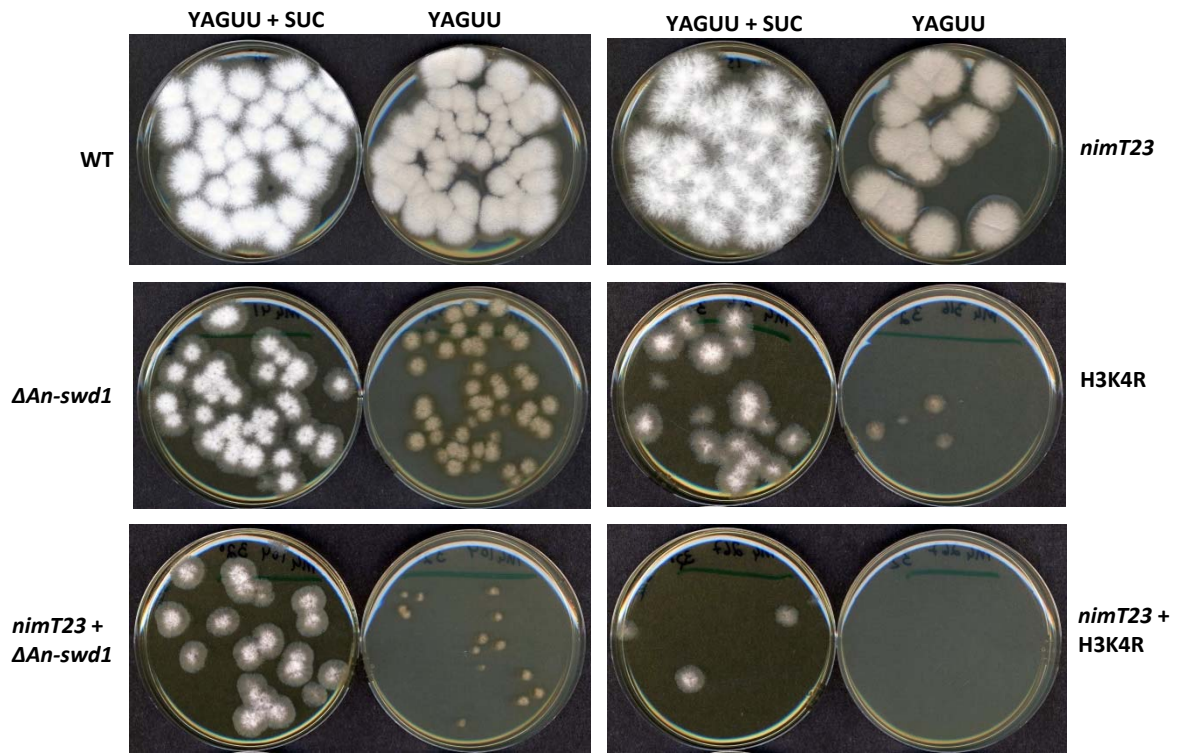

**Figure S3** The degree of genetic interaction between  $\Delta An-swd1$  and *nimT23* is not greater than that between H3K4R and *nimT23*. Colony growth of conidia spread on media with or without 1 M sucrose, as indicated, is shown after 2 days incubated at 32°C. Equal numbers of conidia were plated for each strain. Note that the viability of the H3K4R strain is reduced in the absence of sucrose and that there is a greater growth defect in the *nimT23* + H3K4R strain than for the *nimT23* +  $\Delta An-swd1$  strain. Strains used: WT = R153, *nimT23* = MG151,  $\Delta An-swd1$  = MG41, H3K4R = MG316, *nimT23* +  $\Delta An-swd1$  = MG104, *nimT23* + H3K4R = MG267.

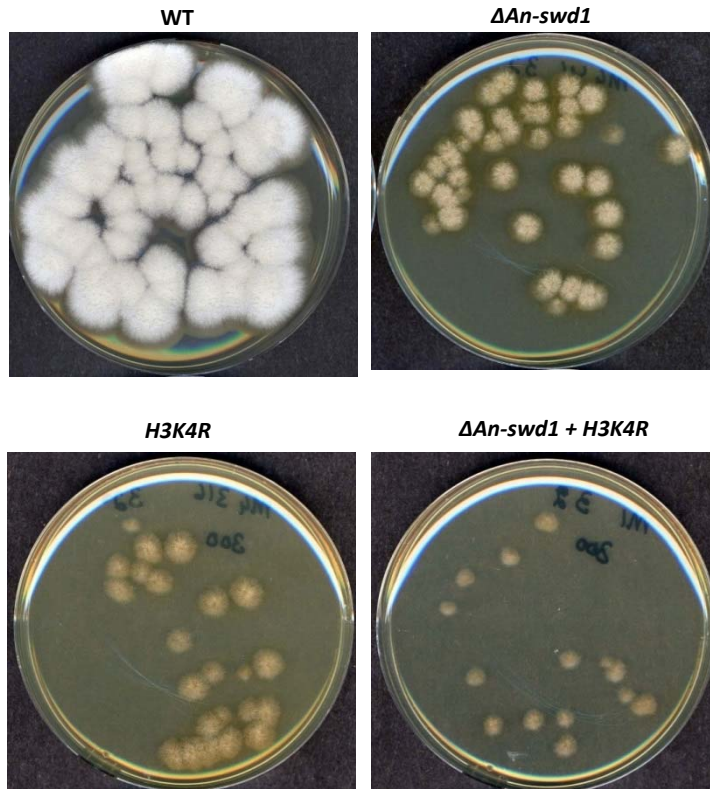

**Figure S4** The  $\Delta An-swd1$  mutant does not cause greater growth defects than the H3K4R mutation. Colony growth of conidia spread on YAGUU is shown after 2 days incubated at 32°C. Equal numbers of conidia were plated for WT and  $\Delta An-swd1$  strains and 10-times more conidia were plated for the H3K4R and  $\Delta An-swd1 + H3K4R$  strains. Note that the viability of the H3K4R and  $\Delta swd1 + H3K4R$  strains are reduced and that there is a slightly greater growth defect in the  $\Delta An-swd1 + H3K4R$  strain than for the H3K4R strain. Strains used: WT = R153,  $\Delta An-swd1$  = MG41, H3K4R = MG316,  $\Delta An-swd1 + H3K4R$  = MG411.

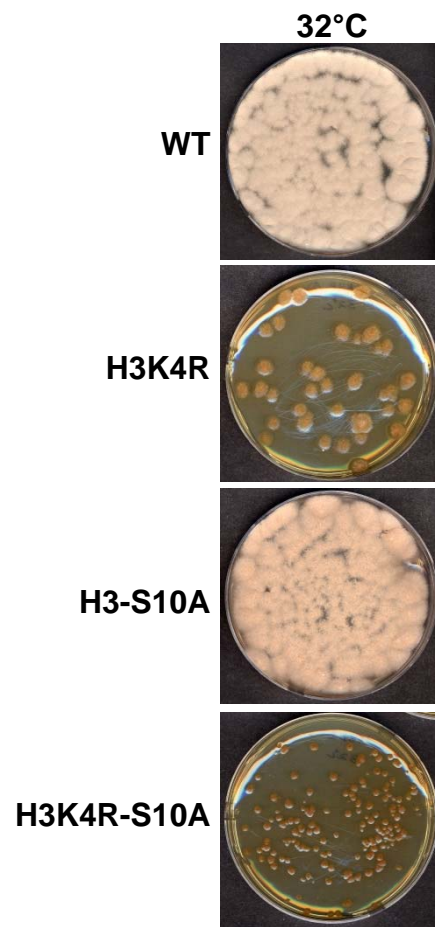

**Figure S5** Lack of the methylatable lysine 4 and phosphorylatable serine 10 in histone H3 results in growth defects but not lethality. Colony growth of the strains carrying either WT H3, H3K4R, H3-S10A or the double mutant at 32°C after 96 hours. WT = R153, H3K4R = MG316, H3-S10A = MG327, H3K4R + S10A = MG320.

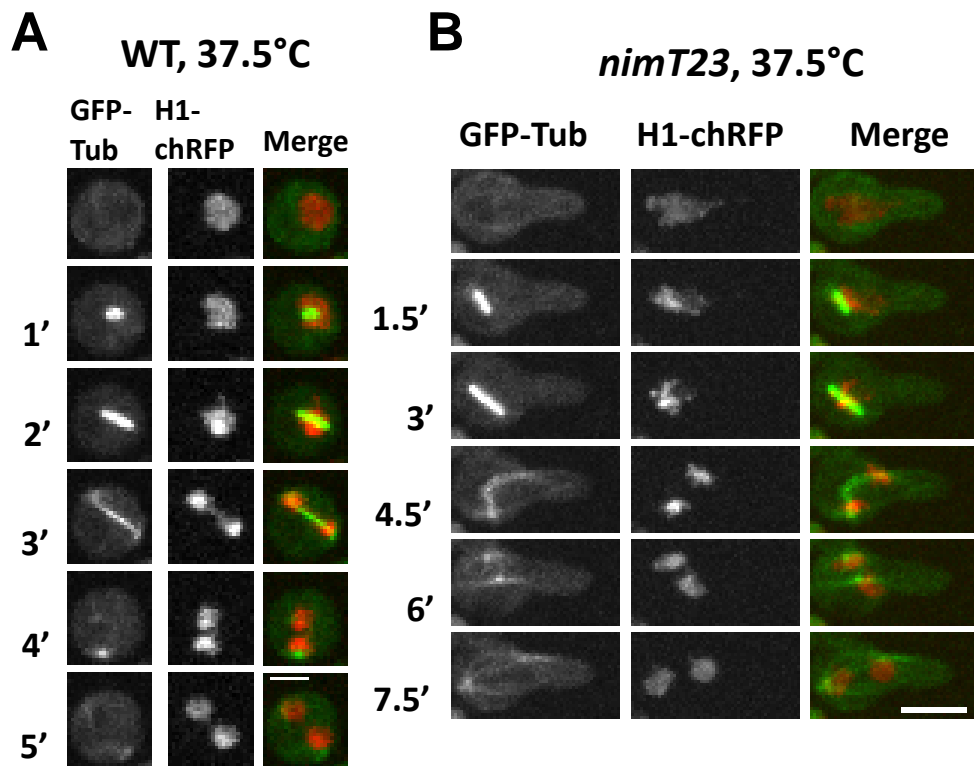

**Figure S6** Cells with partial mitotic CDK1 activity complete mitosis successfully. Mitosis in cells of WT genotype (MG300) (A) and carrying *nimT23* mutant allele (MG304) (B) was followed by live cell imaging using GFP-Tub as a marker for the mitotic spindle and histone H1-chRFP as a marker for chromatin at 37.5°C, the semi-permissive temperature for *nimT23*. In contrast to WT cells, about half (n=13) of the *nimT23* cells had established polarized growth before entering the first nuclear division (see also Figure 4C). Bar for (A) 2.5µm; Bar for (B) 5µm.

**Table S1 Genotypes of strains used in the study.**

| Name   | Genotype (all strains carry <i>veA1</i> )                                                                                         | Source          |
|--------|-----------------------------------------------------------------------------------------------------------------------------------|-----------------|
| R153   | <i>wA3;pyroA4</i>                                                                                                                 | Lab stock       |
| MG71   | <i>nimA7; pyrG<sup>AF</sup>insertion (pyrG89); ΔKu70::argB (argB2); riboA1; pyroA4; nicB8/A2?; wA3</i>                            | This study      |
| MG41   | <i>ΔAn-swd1::pyrG<sup>AF</sup> (pyrG89); ΔKu70::argB(argB/B2); pyroA4; nirA14; sE15, wA3; fwA1; chA1</i>                          | This study      |
| MG65   | <i>nimA7; ΔAn-swd1::pyrG<sup>AF</sup> (pyrG89); ΔKu70::argB (argB2); riboA1; pyroA4; nicB8/A2?; wA3</i>                           | This study      |
| MG99   | <i>nimT23; ΔKu70::argB (argB2); pyrG89; pyroA4; pabaA1; sE15; wA3</i>                                                             | This study      |
| MG104  | <i>nimT23; ΔAn-swd1::pyrG<sup>AF</sup>(pyrG89); ΔKu70::argB (argB2); pyroA4; pabaA1; sE15; wA3</i>                                | This study      |
| MG177  | <i>ΔAn-set1::pyrG<sup>AF</sup> (pyrG89); ΔKu70::argB(argB/B2); pyroA4; nirA14; sE15, wA3; fwA1; chA1</i>                          | This study      |
| MG179  | <i>ΔAn-set1::pyrG<sup>AF</sup> (pyrG89); nimA7; ΔKu70::argB (argB2); riboA1; pyroA4; nicB8/A2?; wA3</i>                           | This study      |
| MG181  | <i>ΔAn-set1::pyrG<sup>AF</sup>(pyrG89); nimT23; ΔKu70::argB (argB2); pyroA4; pabaA1; sE15; wA3</i>                                | This study      |
| MG316  | <i>H3K4R::pyrG<sup>AF</sup> (pyroG89); ΔKu70::argB(argB/B2); pyroA4; nirA14; sE15, wA3; fwA1; chA1</i>                            | This study      |
| MG318  | <i>H3K4R::pyrG<sup>AF</sup> (pyrG89); nimA7; ΔKu70::argB (argB2); riboA1; pyroA4; nicB8/A2?; wA3</i>                              | This study      |
| MG267  | <i>H3K4R::pyrG<sup>AF</sup>(pyrG89); nimT23; ΔKu70::argB (argB2); pyroA4; pabaA1; sE15; wA3</i>                                   | This study      |
| MG327  | <i>H3S10A::pyrG<sup>AF</sup> (pyrG89); ΔKu70::argB(argB/B2); pyroA4; nirA14; sE15, wA3; fwA1; chA1</i>                            | This study      |
| MG320  | <i>H3K4R+S10A::pyrG<sup>AF</sup> (pyroG89); ΔKu70::argB(argB/B2); pyroA4; nirA14; sE15, wA3; fwA1; chA1</i>                       | This study      |
| HA365  | <i>GFP-tub; An-H1-chRFP::pyroA<sup>AF</sup>; pyrG89; (pyroA4; argB2?); ΔKuA::argB</i>                                             | Lab stock [1,2] |
| HA375  | <i>nimT23; GFP-tub; An-H1-chRFP::pyroA<sup>AF</sup>; pyrG89; (pyroA4; argB2?); ΔKuA::argB</i>                                     | Lab stock [1,2] |
| MG160  | <i>ΔAn-swd1::pyrG<sup>AF</sup> (pyrG89); ΔKu70::argB (argB2/argB?); H1chRFP::pyroA<sup>AF</sup>(pyroA4); GFP-tub; wA3</i>         | This study      |
| MG161  | <i>nimT23; ΔAn-swd1::pyrGAF (pyrG89); ΔKu70::argB (argB2/argB?);tubAGFP; H1chRFP::pyroA<sup>AF</sup> (pyroA4)</i>                 | This study      |
| MG300  | <i>pyrG89; H1-chRFP::pyro<sup>AF</sup> (pyroA4); GFP-tub; argB2; nirA14?; nicB8/A2?</i>                                           | This study      |
| MG304  | <i>nimT23; pyrG89; GFP-tub; H1-chRFP::pyro<sup>AF</sup> (pyroA4); argB2; sE15?; yA2/3</i>                                         | This study      |
| MG276  | <i>ΔAn-swd1::pyrG<sup>AF</sup> (pyrG89);H1-chRFP::pyro<sup>AF</sup> (pyroA4); GFP-tub; argB2; nirA14?; nicB8/A2?; wA3</i>         | This study      |
| MG302  | <i>nimT23; ΔAn-swd1::pyrG<sup>AF</sup> (pyrG89); GFP-tub; H1-chRFP::pyro<sup>AF</sup> (pyroA4); argB2; sE15?; fw/wA3</i>          | This study      |
| MG153  | <i>nimA7; pyrG89; ΔKu70::argB? (argB2/argB?); H1chRFP::pyroAAF(pyroA4); GFP-tub; nicB8/A2?</i>                                    | This study      |
| MG159  | <i>ΔAn-swd1::pyrG<sup>AF</sup> (pyrG89); nimA7; ΔKu70::argB (argB2/argB?); H1chRFP::pyroAAF (pyroA4); GFP-tub; nicB8/A2?; wA3</i> | This study      |
| MG224  | <i>argB2; sE15; GFP-tub; AN162-CR; pyrG89; pyroA4; wA2/3; nicB8/A2?; nirA14?</i>                                                  | This study      |
| MG227  | <i>argB2; sE15; nimA7; pyrG89; pyroA4; GFP-tub; AN162-CR; nicB8/A2?; nirA14?; wA2/3</i>                                           | This study      |
| MG190  | <i>nimA7; pyrG89; argB2; ndc80-CR::pyroA<sup>AF</sup> (pyroA4?); GFP-tub; chaA1; GCP3-GFP::riboB<sup>AF</sup>; nicB8/A2?</i>      | This study      |
| MG229  | <i>nimA7; argB2; pyrG89; ΔyA::NLS-DsRed; GFP-tub; pyroA4; nicB8/A2?</i>                                                           | This study      |
| MG244  | <i>argB2; ΔAn-swd1::pyrG<sup>AF</sup> (pyrG89); ΔyA::NLSDsRed; GFP-tub; nicB8/A2?; pyroA4; wA3</i>                                | This study      |
| MG243  | <i>Δswd1-pyrG<sup>AF</sup>(pyrG89); nimA7; GFP-tub; ΔyA::NLS-DsRed; argB2; wA3; pyroA4; nicB8/A2?</i>                             | This study      |
| MG213  | <i>nimA7; Δswd1-pyrG<sup>AF</sup>(pyrG89); argB2; nup49-CR::pyroA<sup>AF</sup>(pyroA4); GFP-tub; nirA14?; nicB8/A2?; wA3</i>      | This study      |
| CDS790 | <i>nimA7; argB2; wA3</i>                                                                                                          | [3]             |
| MG215  | <i>nimA7; Δswd1-pyrG<sup>AF</sup>(pyrG89); argB2; nicB8/A2?; wA3</i>                                                              | This study      |
| CDS629 | <i>ΔAn-mad2::pyrG<sup>AF</sup>; pyroA4; pyrG89; chaA1</i>                                                                         | [4]             |
| MG383  | <i>ΔAn-swd1::pyrG<sup>AF</sup>(pyrG89); ΔAn-mad2::pyrG<sup>AF</sup>(pyrG89); pyroA4; nirA14?; nicB8/A2?; chaA1</i>                | This study      |
| MG381  | <i>nimA7; ΔAn-mad2::pyrG<sup>AF</sup>(pyrG89); pyroA4; nirA14?; nicB8/A2?; chaA1</i>                                              | This study      |
| MG405  | <i>nimT23; ΔAn-mad2::pyrG<sup>AF</sup>(pyrG89); pyroA4; argB2; sE15?; wA/chaA/fw</i>                                              | This study      |
| MG384  | <i>nimA7; ΔAn-swd1::pyroG<sup>AF</sup> (pyrG89); Δmad2::pyrG<sup>AF</sup> (pyrG89);pyroA4; nirA14?; nicB8/A2?; wA/chaA1</i>       | This study      |
| MG219  | <i>nimT23; Δswd1-pyrG<sup>AF</sup>(pyrG89); argB2; pabaA1; pyroA4; sE15?; wA/yA</i>                                               | This study      |
| SOS3   | <i>nimT23; wA2</i>                                                                                                                | [5]             |
| MG402  | <i>nimT23; ΔAn-swd1::pyrG<sup>AF</sup> (pyrG89); Δmad2::pyrG<sup>AF</sup> (pyrG89); pyroA4; argB2; sE15?; wA/chaA/fw</i>          | This study      |
| MG218  | <i>Δswd1-pyrG<sup>AF</sup>(pyrG89); riboA1; argB2; nicB8/A2?; wA3</i>                                                             | This study      |
| MG151  | <i>pyrG<sup>AF</sup> insertion (pyrG89); nimT23; ΔKu70::argB (argB2); pyroA4; pabaA1; sE15; wA3.</i>                              | This study      |
| MG411  | <i>ΔAn-swd1::pyroA<sup>AF</sup> (pyroA4); H3K4R::pyrG<sup>AF</sup> (pyrG89); sE15; nirA14; wA3; fwA1; chA1.</i>                   | This study      |

Question marks indicate mutations or alleles that may be present in the strain and have not been tested for.

1. Yang L, Ukil L, Osmani A, Nahm F, Davies J, et al. (2004) Rapid production of gene replacement constructs and generation of a green fluorescent protein-tagged centromeric marker in *Aspergillus nidulans*. *Eukaryot Cell* 3: 1359-1362.
2. Todd RB, Davis MA, Hynes MJ (2007) Genetic manipulation of *Aspergillus nidulans*: heterokaryons and diploids for dominance, complementation and haploidization analyses. *Nat Protoc* 2: 822-830.
3. Osmani SA, Ye XS (1996) Cell cycle regulation in *Aspergillus* by two protein kinases. *Biochem J* 317 ( Pt 3): 633-641.
4. De Souza CP, Hashmi SB, Nayak T, Oakley B, Osmani SA (2009) Mlp1 acts as a mitotic scaffold to spatially regulate spindle assembly checkpoint proteins in *Aspergillus nidulans*. *Mol Biol Cell* 20: 2146-2159.
5. Ye XS, Fincher RR, Tang A, Osmani SA (1997) The G2/M DNA damage checkpoint inhibits mitosis through Tyr15 phosphorylation of p34<sup>cdc2</sup> in *Aspergillus nidulans*. *EMBO J* 16: 182-192.
