# Supplementary material
Source: PubMed Central journal article supplement (PMC4125396)
Supplement: 51205915ac5ce2f64d7eb386701795c0_genetics.114.165647-2.pdf [file 51205915ac5ce2f64d7eb386701795c0_genetics.114.165647-2.pdf]

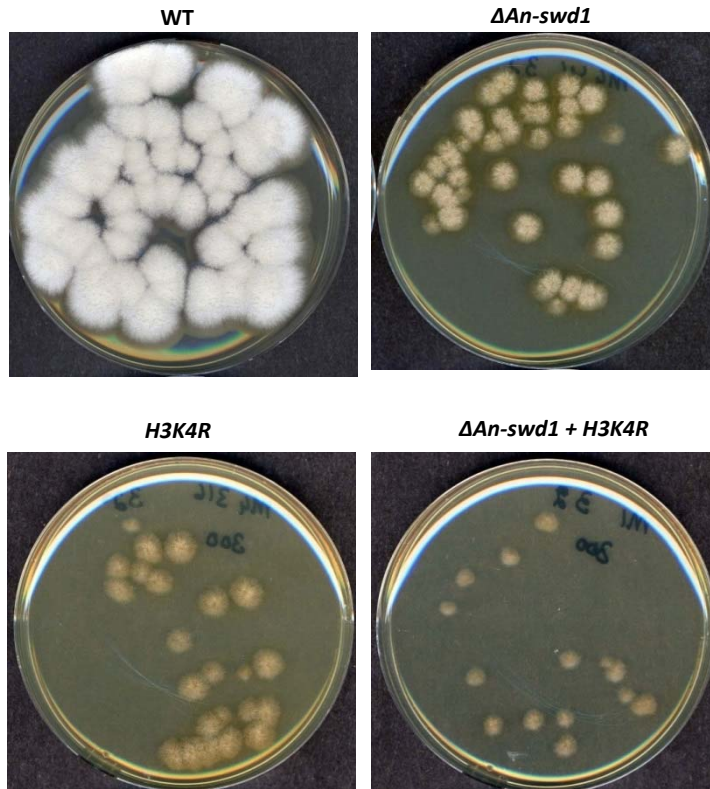

**Figure S4** The  $\Delta An-swd1$  mutant does not cause greater growth defects than the H3K4R mutation. Colony growth of conidia spread on YAGUU is shown after 2 days incubated at 32°C. Equal numbers of conidia were plated for WT and  $\Delta An-swd1$  strains and 10-times more conidia were plated for the H3K4R and  $\Delta An-swd1 + H3K4R$  strains. Note that the viability of the H3K4R and  $\Delta swd1 + H3K4R$  strains are reduced and that there is a slightly greater growth defect in the  $\Delta An-swd1 + H3K4R$  strain than for the H3K4R strain. Strains used: WT = R153,  $\Delta An-swd1$  = MG41, H3K4R = MG316,  $\Delta An-swd1 + H3K4R$  = MG411.
