# Supplementary material
Source: PubMed Central journal article supplement (PMC4125396)
Supplement: b23a20fbb1e0ba1a322352706b929999_genetics.114.165647-7.pdf [file b23a20fbb1e0ba1a322352706b929999_genetics.114.165647-7.pdf]

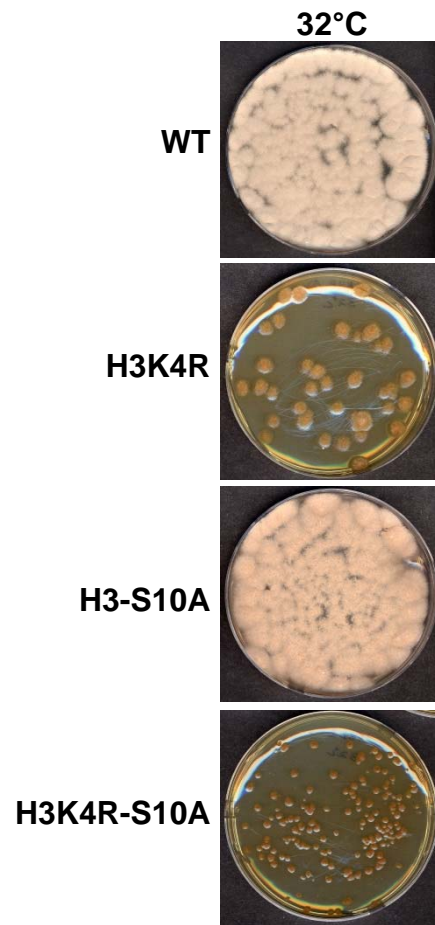

**Figure S5** Lack of the methylatable lysine 4 and phosphorylatable serine 10 in histone H3 results in growth defects but not lethality. Colony growth of the strains carrying either WT H3, H3K4R, H3-S10A or the double mutant at 32°C after 96 hours. WT = R153, H3K4R = MG316, H3-S10A = MG327, H3K4R + S10A = MG320.
