# Supplementary material
Source: PubMed Central journal article supplement (PMC4125396)
Supplement: cf34c9d556c384833104695126e3f0bb_genetics.114.165647-8.pdf [file cf34c9d556c384833104695126e3f0bb_genetics.114.165647-8.pdf]

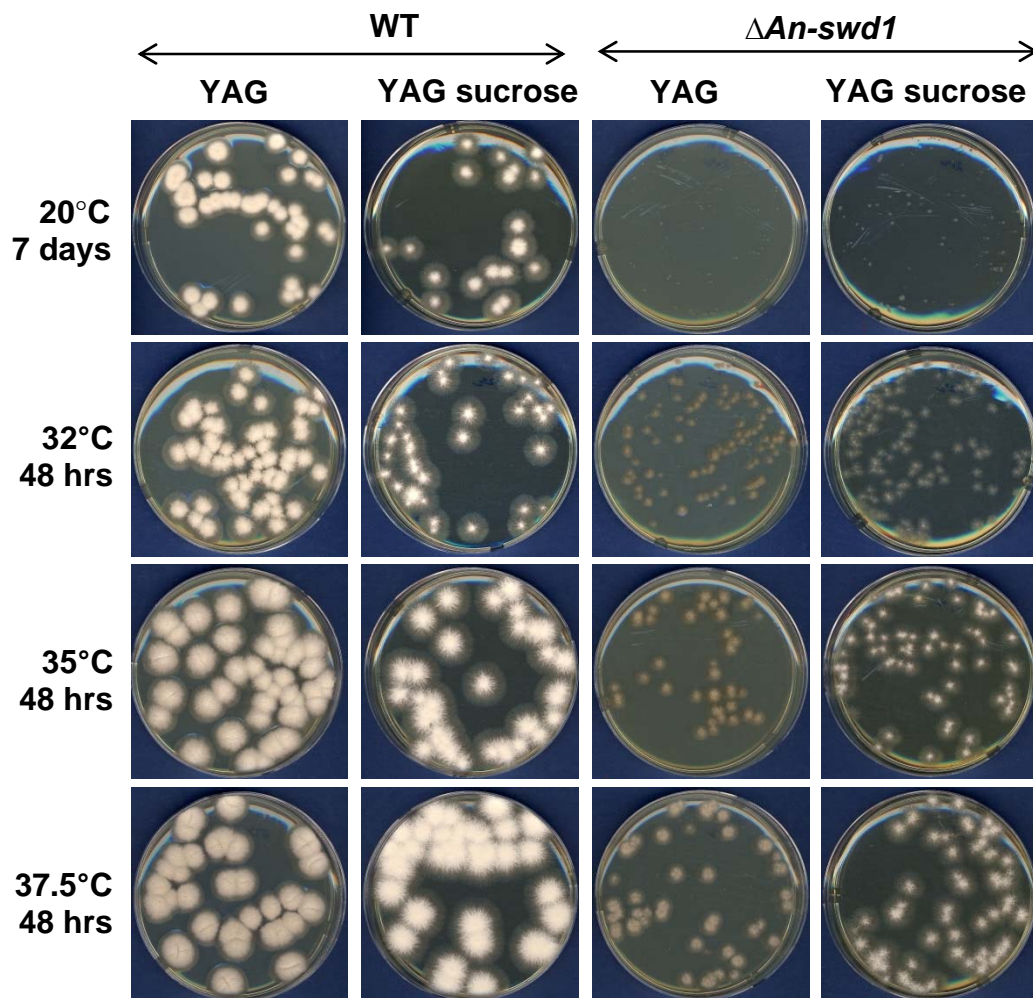

**Figure S1** Deletion of *An-swd1* confers cold sensitivity. Colony growth of  $\Delta An-swd1$  (strain MG41) from single conidia at the indicated temperatures on media with or without 1 M sucrose, in comparison to wild type (WT, strain R153). The conidiation defects, but not cold sensitivity, of  $\Delta An-swd1$  cells are remediated in the presence of 1 M sucrose.
